# Supplementary material for: The Primary Effect on the Proteome of ARID1A-mutated Ovarian Clear Cell Carcinoma is Downregulation of the Mevalonate Pathway at the Post-transcriptional Level
Source: PubMed Central journal article supplement (PMC5098034; doi:10.1074/mcp.m116.062539), 2016-09-21

## Supplemental Data

**Figure S1. Validation of ARID1A knockout in OVCA429.** Representative immunoblot of cell lysates from ARID1A CRISPR knockout or control cells derived from OVCA429. Two CRISPR knockout clones are shown. Clone #2 had a somewhat stronger response to the EZH2 inhibitor GSK12 (20) and was used for the detailed proteome analysis summarized in this study.

**Figure S2. Reproducibility of OVCA429 proteome analysis.** A-B. Scatterplots of LFQ intensities for proteins identified in OVCA429 proteomes from two passages of control (A) and knockout (B) cells.  $R^2$  calculated from linear-fit trend line.

**Figure S3. Validation of ARID1A induction in OVISE.** Representative immunoblot of cell lysates from OVISE cell line harboring a tetracycline-inducible wild-type ARID1A construct treated with vehicle (DMSO) or doxycycline to induce expression (DOX).

**Figure S4. Distribution of LFQ intensities for protein groups identified in proteome analyses.** Histograms of protein group LFQ intensities are shown for OVCA429 proteomes (A) and OVISE proteomes (B). Blue bars: frequency of LFQ intensities calculated by MaxQuant. Orange bars: frequency of LFQ intensities imputed by Perseus.

**Supplemental Table S1. Peptide identifications in biological triplicate analyses of OVCA429 with and without ARID1A CRISPR knockout.**

**Supplemental Table S2. Protein identifications in biological triplicate analyses of OVCA429 with and without ARID1A CRISPR knockout.**

**Supplemental Table S3. Quantitative proteome comparisons between OVCA429 with and without ARID1A CRISPR knockout.**

**Supplemental Table S4. Peptide identifications in biological triplicate analyses of OVISE with and without ARID1A induction.**

**Supplemental Table S5. Protein identifications in biological triplicate analyses of OVISE with and without ARID1A induction.**

**Supplemental Table S6. Quantitative proteome comparisons between OVISE with and without ARID1A induction.**

**Supplemental Table S7. Effects of wild-type ARID1A induction on protein levels with and without imputation of missing values.** Calculation of fold-change and p-values for proteins listed in Table 2 with or without replacing missing values by imputation. With imputation, log ratios and Student's t-test p-values were calculated using  $\log_2$  transformed data as described in Experimental Procedures and converted into fold-changes. Without imputation, missing values were kept as 0, and fold-changes and Student's t-test p-values were calculated using untransformed data. If a protein was only quantified in one condition, a division by zero error occurred ("DIV/0"). Red and blue background: higher or lower protein level after ARID1A

induction. Grey background: no significant change in level after ARID1A induction. Significant p-values ( $p < 0.05$ ) are bolded.

| Gene name | Protein name                                                                           | OVISE ARID1A induction vs. control (with imputation) |         | # missing values |         | OVISE ARID1A induction vs. control (without imputation) |         |
|-----------|----------------------------------------------------------------------------------------|------------------------------------------------------|---------|------------------|---------|---------------------------------------------------------|---------|
|           |                                                                                        | Fold-change                                          | P-value | ARID1A Induction | Control | Fold-change                                             | P-value |
| ARID1A    | AT-rich interactive domain-containing protein 1A                                       | 223.48                                               | <0.001  | 0                | 1       | 349.17                                                  | <0.001  |
| ABAT      | 4-aminobutyrate aminotransferase, mitochondrial                                        | 151.37                                               | <0.001  | 0                | 0       | 131.27                                                  | <0.001  |
| MAP1B     | Microtubule-associated protein 1B                                                      | 53.86                                                | <0.001  | 0                | 0       | 52.26                                                   | <0.001  |
| MYL4      | Myosin light chain 4                                                                   | 41.70                                                | <0.001  | 0                | 0       | 41.72                                                   | <0.001  |
| PTGS2     | Prostaglandin G/H synthase 2                                                           | -34.53                                               | 0.0029  | 1                | 0       | -29.20                                                  | <0.001  |
| EFNB1     | Ephrin-B1                                                                              | 28.13                                                | 0.0144  | 0                | 2       | 20.03                                                   | 0.0342  |
| ASS1      | Argininosuccinate synthase                                                             | 27.16                                                | <0.001  | 0                | 0       | 25.84                                                   | <0.001  |
| DPF2      | Zinc finger protein ubi-d4                                                             | 16.70                                                | <0.001  | 0                | 0       | 16.39                                                   | <0.001  |
| ZNF384    | Zinc finger protein 384                                                                | -16.59                                               | <0.001  | 3                | 0       | DIV/0                                                   | <0.001  |
| LMCD1     | LIM and cysteine-rich domains protein 1                                                | 15.66                                                | <0.001  | 0                | 0       | 15.64                                                   | 0.0019  |
| RAB2B     | Ras-related protein Rab-2B                                                             | -12.60                                               | 0.0011  | 0                | 0       | -13.85                                                  | 0.0475  |
| TPX2      | Targeting protein for Xklp2                                                            | -11.02                                               | <0.001  | 0                | 0       | -11.42                                                  | 0.0110  |
| ARHGDIB   | Rho GDP-dissociation inhibitor 2                                                       | 10.16                                                | 0.0012  | 0                | 3       | DIV/0                                                   | 0.0060  |
| SLC4A11   | Sodium bicarbonate transporter-like protein 11                                         | 9.62                                                 | <0.001  | 0                | 2       | 22.79                                                   | 0.0052  |
| LICAM     | Neural cell adhesion molecule L1                                                       | 9.31                                                 | <0.001  | 0                | 0       | 9.30                                                    | <0.001  |
| GCNT3     | Beta-1,3-galactosyl-O-glycosyl-glycoprotein beta-1,6-N-acetylglucosaminyltransferase 3 | -9.12                                                | <0.001  | 0                | 0       | -8.84                                                   | <0.001  |
| SAMD9     | Sterile alpha motif domain-containing protein 9                                        | 9.07                                                 | 0.0025  | 0                | 0       | 8.73                                                    | 0.0068  |
| CWC27     | Peptidyl-prolyl cis-trans isomerase CWC27 homolog                                      | -8.79                                                | <0.001  | 3                | 0       | DIV/0                                                   | <0.001  |
| ZHX2      | Zinc fingers and homeoboxes protein 2                                                  | -8.71                                                | 0.0047  | 3                | 0       | DIV/0                                                   | 0.0170  |
| OBSL1     | Obscurin-like protein 1                                                                | 8.70                                                 | <0.001  | 0                | 0       | 8.35                                                    | <0.001  |
| PLAU      | Urokinase-type plasminogen activator                                                   | -8.67                                                | <0.001  | 0                | 0       | -8.63                                                   | <0.001  |
| AIM1L     | Absent in melanoma 1-like protein                                                      | 8.64                                                 | 0.0145  | 0                | 0       | 7.97                                                    | 0.0349  |
| ZNF280C   | Zinc finger protein 280C                                                               | -8.57                                                | <0.001  | 3                | 0       | DIV/0                                                   | <0.001  |
| CYP2S1    | Cytochrome P450 2S1                                                                    | 7.99                                                 | 0.0016  | 0                | 0       | 7.45                                                    | <0.001  |
| ZBTB38    | Zinc finger and BTB domain-containing protein 38                                       | -7.87                                                | 0.0341  | 2                | 0       | -7.17                                                   | 0.0253  |

# Fig. S1

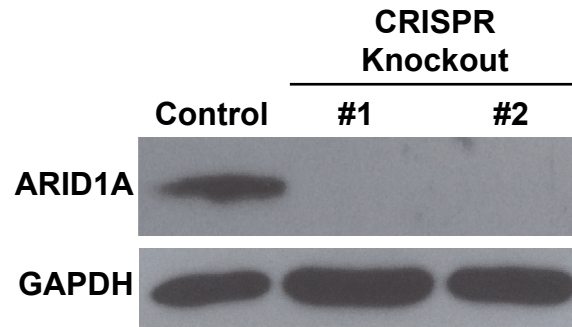

# Fig. S2

## A

### Control

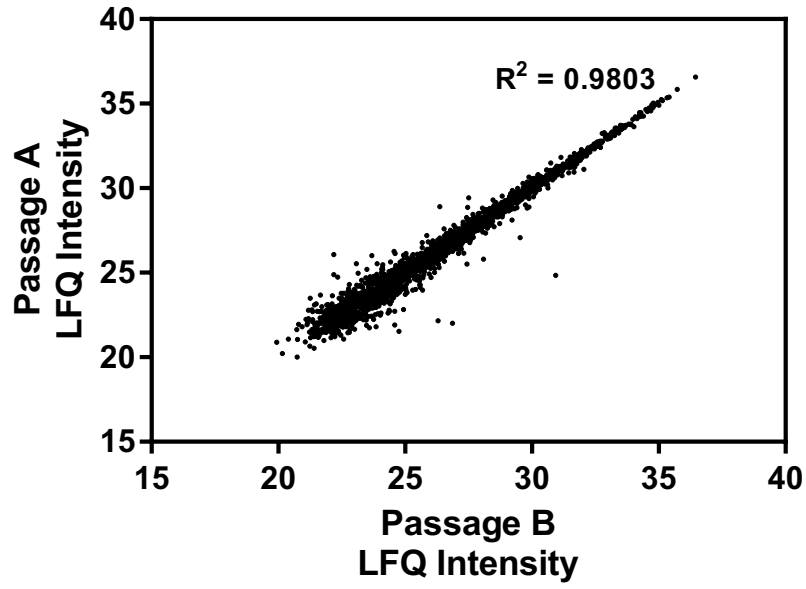

## B

### ARID1A Knockout

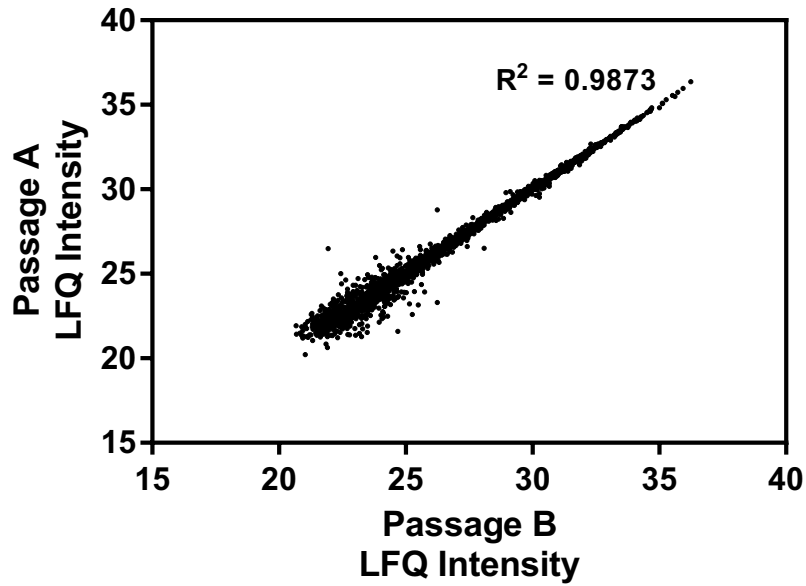

# Fig. S3

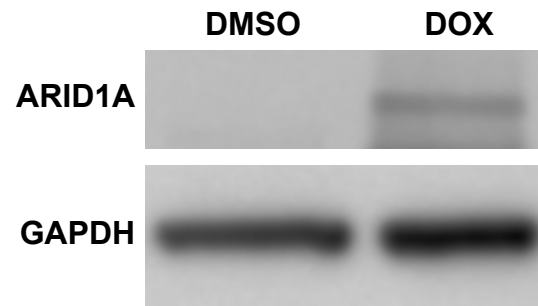

# Fig. S4

## A

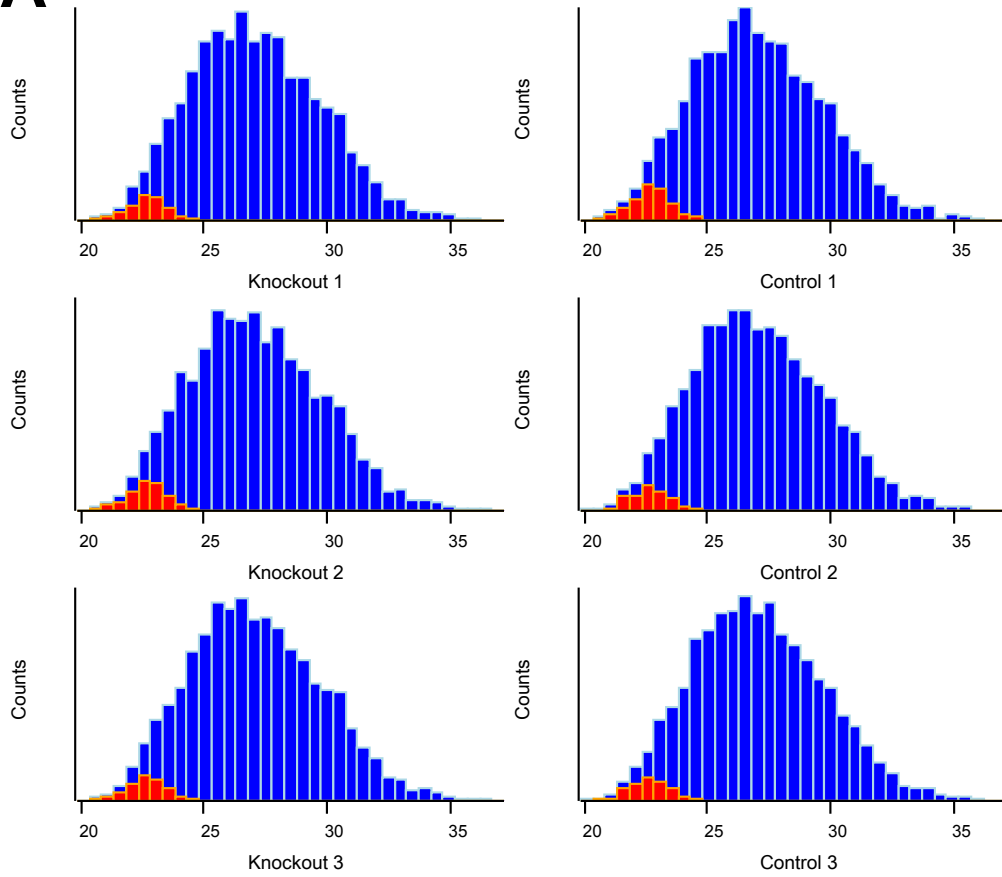

## B

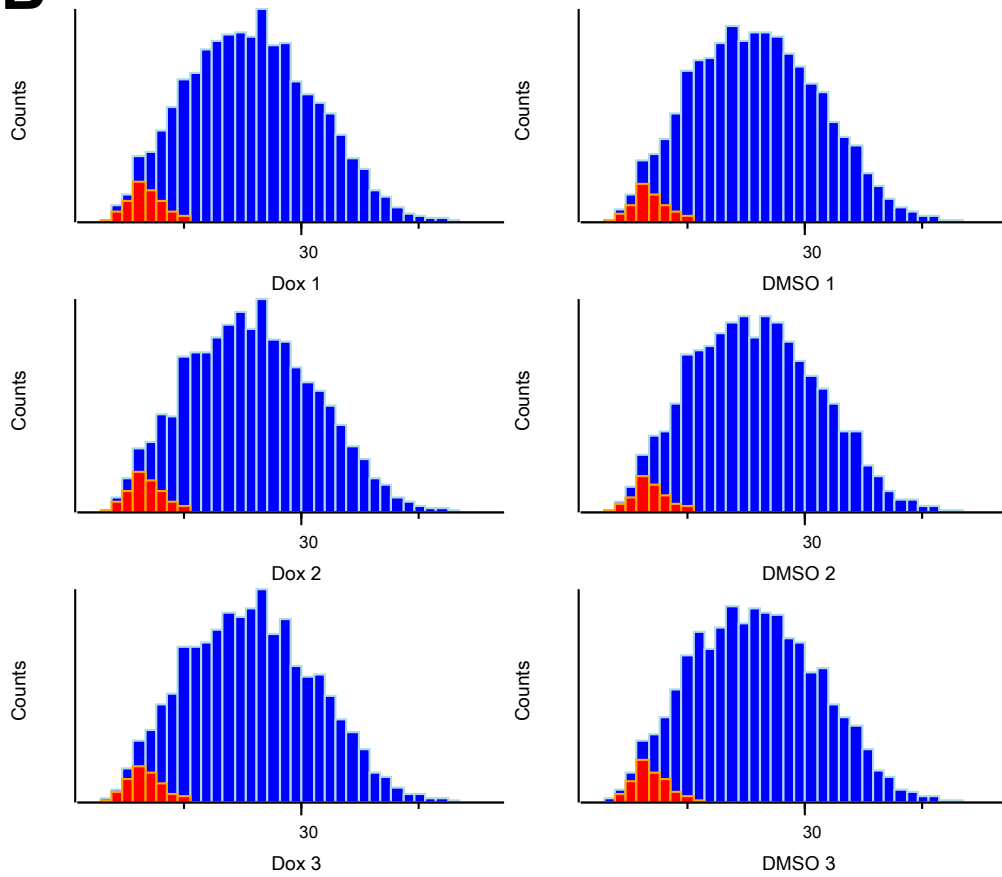

Supplement: 10.1074_M116.062539_mcp.M116.062539-7.pdf [file 10.1074_M116.062539_mcp.M116.062539-7.pdf]
